# Supplementary material for: Thermodynamic efficiency, reversibility, and degree of coupling in energy conservation by the mitochondrial respiratory chain
Source: PubMed Central journal article supplement (PMC7434914; doi:10.1038/s42003-020-01192-w), 2020-08-18
Supplement: 42003_2020_1192_MOESM3_ESM.pdf [file 42003_2020_1192_MOESM3_ESM.pdf]

## Description of Additional Supplementary Files

**File Name:** Supplementary Data 1

**Description** source data file
