# Supplementary material for: Thermodynamic efficiency, reversibility, and degree of coupling in energy conservation by the mitochondrial respiratory chain
Source: Commun Biol. 2020 Aug 18;3:451. doi: 10.1038/s42003-020-01192-w (PMC7434914; doi:10.1038/s42003-020-01192-w)
Supplement: Supplementary file 1 — Supplementary Information [file 42003_2020_1192_MOESM1_ESM.pdf]

## P/O ratios

The P/O ratios were taken from Hinkle (21) and only data from 1960 forward was used as there was too much variation in the pre-1960 data. The data used in the manuscript is given in supplementary table 1

|                                  | NADH-O <sub>2</sub> | Succ-O <sub>2</sub> | Site 3        |
|----------------------------------|---------------------|---------------------|---------------|
| Jacobs and Sanadi 1960           |                     |                     | 0.95          |
| Estabrook 1967                   |                     | 1.7                 |               |
| Lee et al. 1967                  |                     |                     |               |
| Chamalaun and Tager 1969         |                     |                     | 0.94          |
| Klingenberg 1975                 |                     | 1.4                 |               |
| Hinkle and Yu 1979               | 2.2                 | 1.4                 |               |
| Pozzan et al. 1979               |                     |                     |               |
| Azzone et al. 1979               |                     | 1.9                 | 1.3           |
| Lemasters 1984                   | 2.6                 | 1.7                 |               |
| Beavis and Lehninger 1986        | 2.7–2.9             | 1.6–1.8             |               |
| Jensen et al. 1986               |                     | 1.4–1.8             |               |
| Stoner 1987                      | 2.6                 | 1.5                 | 1.0           |
| Hafner and Brand 1988            |                     | 1.4                 |               |
| Luvisetto and Azzone 1989        |                     | 1.3–1.5             |               |
| Toth et al. 1990                 | 3.3–3.5             |                     |               |
| Hinkle et al. 1991               | 2.3                 | 1.5                 | 0.98          |
| Davis and Davis-von Thienen 1991 | 2.5                 |                     |               |
| Lee et al. 1996                  | 2.9                 | 1.8                 |               |
| Fontaine et al. 1997             |                     | 1.3–1.5             |               |
| Devin et al. 1997                | 2.5                 |                     |               |
| Gnaiger et al. 2000              |                     | 1.6                 |               |
| Mean±SD (n)                      | 2.64±1.2 (9)        | 1.57±0.05 (14)      | 1.03±0.07 (5) |

Supplementary table 1. P/O ratios from Hinkle (21) used in the manuscript.

## Calculation of J or H<sup>+</sup>/e<sup>-</sup>

The proton to electron ratio (H<sup>+</sup>/e<sup>-</sup>), which is equal to *j*, is calculated from equation 6 of the manuscript using the P/O ratios of table S1. The calculation of the P/O ratios of complex I and III from the values in supplementary table 1 is given in the methods. The calculated values are given in supplementary table 2 along with *j*/Z.

|                  | H <sup>+</sup> /e <sup>-</sup> | <i>j</i> /Z |
|------------------|--------------------------------|-------------|
| Complex I+III+IV | 4.84                           | 0.968       |
| Complex III+IV   | 2.87                           | 0.957       |
| Complex I        | 1.97                           | 0.985       |
| Complex III      | 0.98                           | 0.98        |
| Complex IV       | 1.89                           | 0.945       |

Supplementary table 2. H<sup>+</sup>/e<sup>-</sup> ratio and *j*/Z calculated using the P/O ratios of supplementary table 1.

## Redox potentials in State 3 and State 4

The reduction states of NADH, Ubiquinone and cytochrome c in state-3 and state 4 were digitized from the TMPD, succinate,  $\beta$ -hydroxybutyrate, pyruvate, glutamate data from figures 2, 3, 5,6 and 7, respectively, of Muraoka & Slater (20) and given in supplementary table 3.

| Substrate     | State 4 |    |      | State 3 |    |      |
|---------------|---------|----|------|---------|----|------|
|               | NADH    | UQ | Cytc | NADH    | UQ | Cytc |
| Glutamate     | 54      | 56 | 12   | 22      | 24 | 12   |
| Pyruvate      | 35      | 46 | 8    | 19      | 14 | 5    |
| B-OH Butyrate | 67      | 62 | 9    | 33      | 19 | 6    |
| Succinate     |         | 90 | 28   |         | 59 | 11   |
| TMPD          |         |    | 38   |         |    | 18   |

Supplementary table 3. Values of the reduction state of NADH, ubiquinone (UQ) and cytochrome c (Cytc) with different substrates, expressed as % reduced used in the manuscript.

These reduction states were used in the supplementary spreadsheet to calculate the redox potentials and other values of table 2 of the manuscript.

The values of  $Z_x$  from table I of the manuscript are also calculated in the spreadsheet. The value of  $j/Z$  of table 1 is calculated in supplementary table 2 and the values of  $\eta$  and  $q$  are calculated using equations 5 and 7 of the manuscript.
